# Supplementary material
Source: HighWire-hosted journal article supplement (https://fn.bmj.com/content/106/3/311)
Supplement: inline-supplementary-material-2 [file inline-supplementary-material-2.pdf]

**Legends for online supplementary material**

Figure 1 –NeoBeat Heart Rate Meter (Laerdal Global Health, Stavanger, Norway) in use during data collection.
